# Supplementary material for: Assessing Geographical Origin of Gentiana Rigescens Using Untargeted Chromatographic Fingerprint, Data Fusion and Chemometrics
Source: PubMed Central journal article supplement (PMC6680800; doi:10.3390/molecules24142562), 2019-07-14
Supplement: molecules-24-02562-s001.pdf [file molecules-24-02562-s001.pdf]

# Assessing geographical origin of *Gentiana rigescens* using untargeted chromatographic fingerprint, data fusion and chemometrics

Tao Shen <sup>1,2,3</sup>, Hong Yu <sup>1,2\*</sup>, Yuan-Zhong Wang <sup>4</sup>

<sup>1</sup> Yunnan Herbal Laboratory, Institute of Herb Biotic Resources, School of Life and Sciences, Yunnan University, Kunming 650091, China; st\_yxnu@126.com

<sup>2</sup> The International Joint Research Center for Sustainable Utilization of Cordyceps Bioresources in China and Southeast Asia, Yunnan University, Kunming 650091, China

<sup>3</sup> College of Chemistry, Biological and Environment, Yuxi Normal University, Yu'xi 653100, Yunnan, China

<sup>4</sup> College of Traditional Chinese Medicine, Yunnan University of Chinese Medicine, Kunming 650500, China

\* Correspondence: hongyu@ynu.edu.cn, herbfish@163.com (H.Y.); Tel:+86-0871-68182671

## Figure captions

**Figure S1.** Variation of stems score plots along the latitude gradients

**Figure S2.** Variation of stems score plots between the adjacent latitudes

**Figure S3.** Variation of leaves score plots along the latitude gradients

**Figure S4.** Variation of leaves score plots between the adjacent latitudes

**Figure S5.** Permutation plot of the OPLS-DA of rhizome samples

**Figure S6.** Permutation plot of the OPLS-DA of stem samples

**Figure S7.** Permutation plot of the OPLS-DA of leaf samples

**Figure S8.** The  $n_{\text{tree}}$  and  $m_{\text{try}}$  screening of RF models based on low-level data fusion strategy

**Figure S9.** Result of variables selection of rhizome fingerprint data based on “Boruta” algorithm (red triangle = relevant features variables)

**Figure S10.** Result of variables selection of stem fingerprint data based on “Boruta” algorithm

**Figure S11.** Result of variables selection of leaf fingerprint data based on “Boruta” algorithm

**Figure S12.** The  $n_{\text{tre}}$  and  $m_{\text{try}}$  screening of RF models based on mid-level data fusion strategy

**Figure S13.** The importance variables of OPLS-DA models of rhizomes, stems and leaves fingerprints data

**Figure S14.** Permutation testing (200 times) of the R\_OPLS-DA model

**Figure S15.** Permutation testing (200 times) of the S\_OPLS-DA model

**Figure S16.** Permutation testing (200 times) of the L\_OPLS-DA model

**Figure S17.** Permutation testing (200 times) of the RS\_OPLS-DA model based on low-level data fusion

**Figure S18.** Permutation testing (200 times) of the RL\_OPLS-DA model based on low-level data fusion

**Figure S19.** Permutation testing (200 times) of the SL\_OPLS-DA model based on low-level data fusion

**Figure S20.** Permutation testing (200 times) of the RSL\_OPLS-DA model based on low-level data fusion

**Figure S21.** Permutation testing (200 times) of the RS\_OPLS-DA model based on mid-level data fusion

**Figure S22.** Permutation testing (200 times) of the RL\_OPLS-DA model based on mid-level data fusion

**Figure S23.** Permutation testing (200 times) of the SL\_OPLS-DA model based on mid-level data fusion

**Figure S24.** Permutation testing (200 times) of the RSL\_OPLS-DA model based on mid-level data fusion

### **Table captions**

**Table S1.** The evaluation indexes for predictive power of OPLS-DA model of rhizome, stem and leaf

**Table S2.** The evaluation indexes for predictive power of OPLS-DA models based on low-level and mid-level data fusion strategies

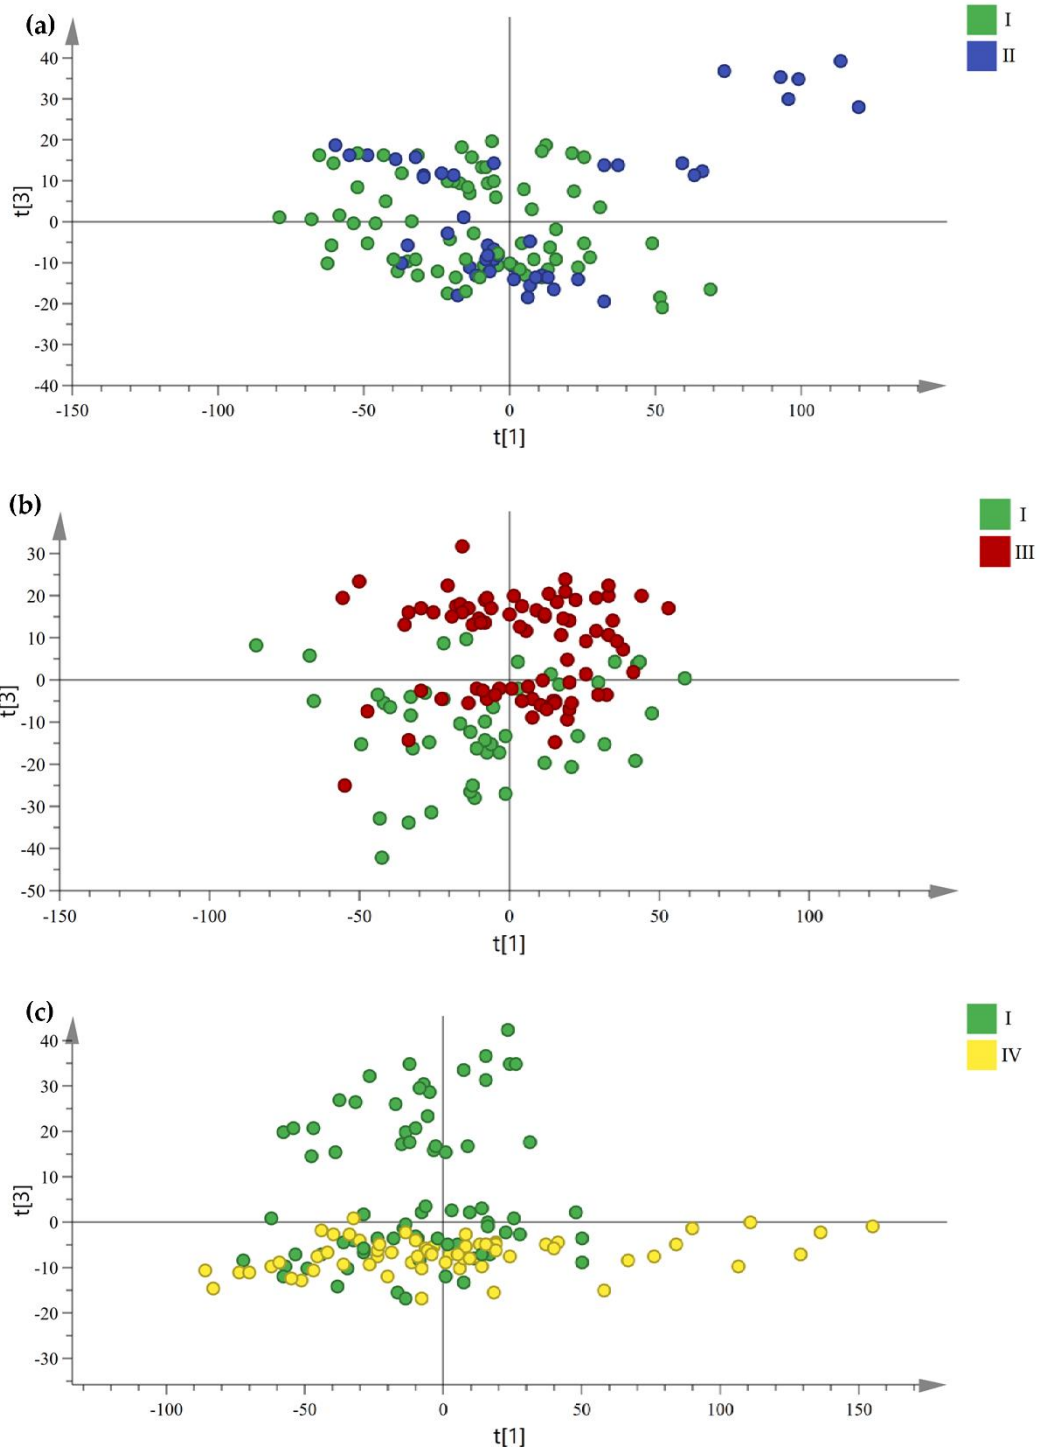

**Figure S1.** Variation of stems score plots along the latitude gradients (green circles = low latitudes area, 23.92-23.66 °N, blue circles = mid latitude area, 24.95-25.06 °N, red circles = mid-high latitude area, 26.49-26.64 °N, yellow circles = high latitude area, 27.34-28.52 °N)

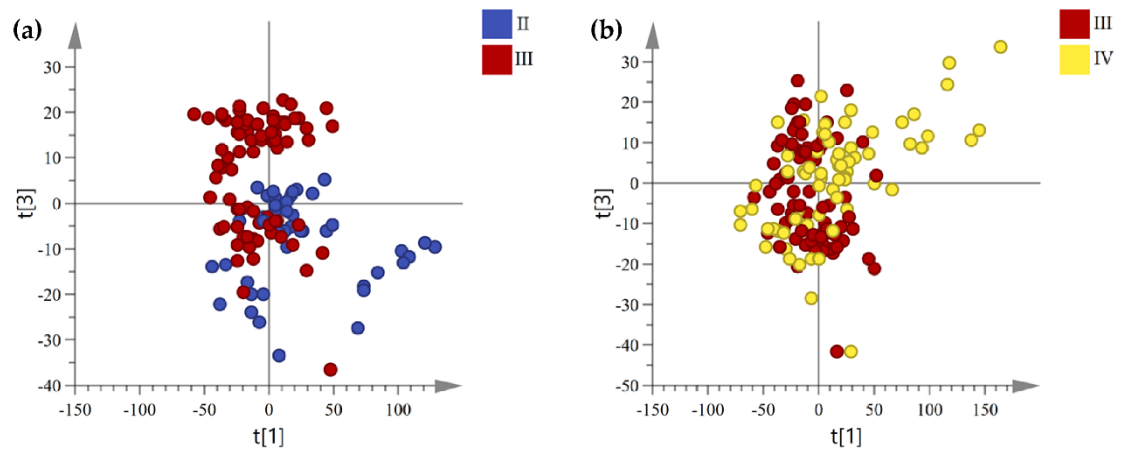

**Figure S2.** Variation of stems score plots between the adjacent latitudes (blue circles = mid latitude area, 24.95-25.06 °N, red circles = mid-high latitude area, 26.49-26.64 °N, yellow circles = high latitude area, 27.34-28.52 °N)

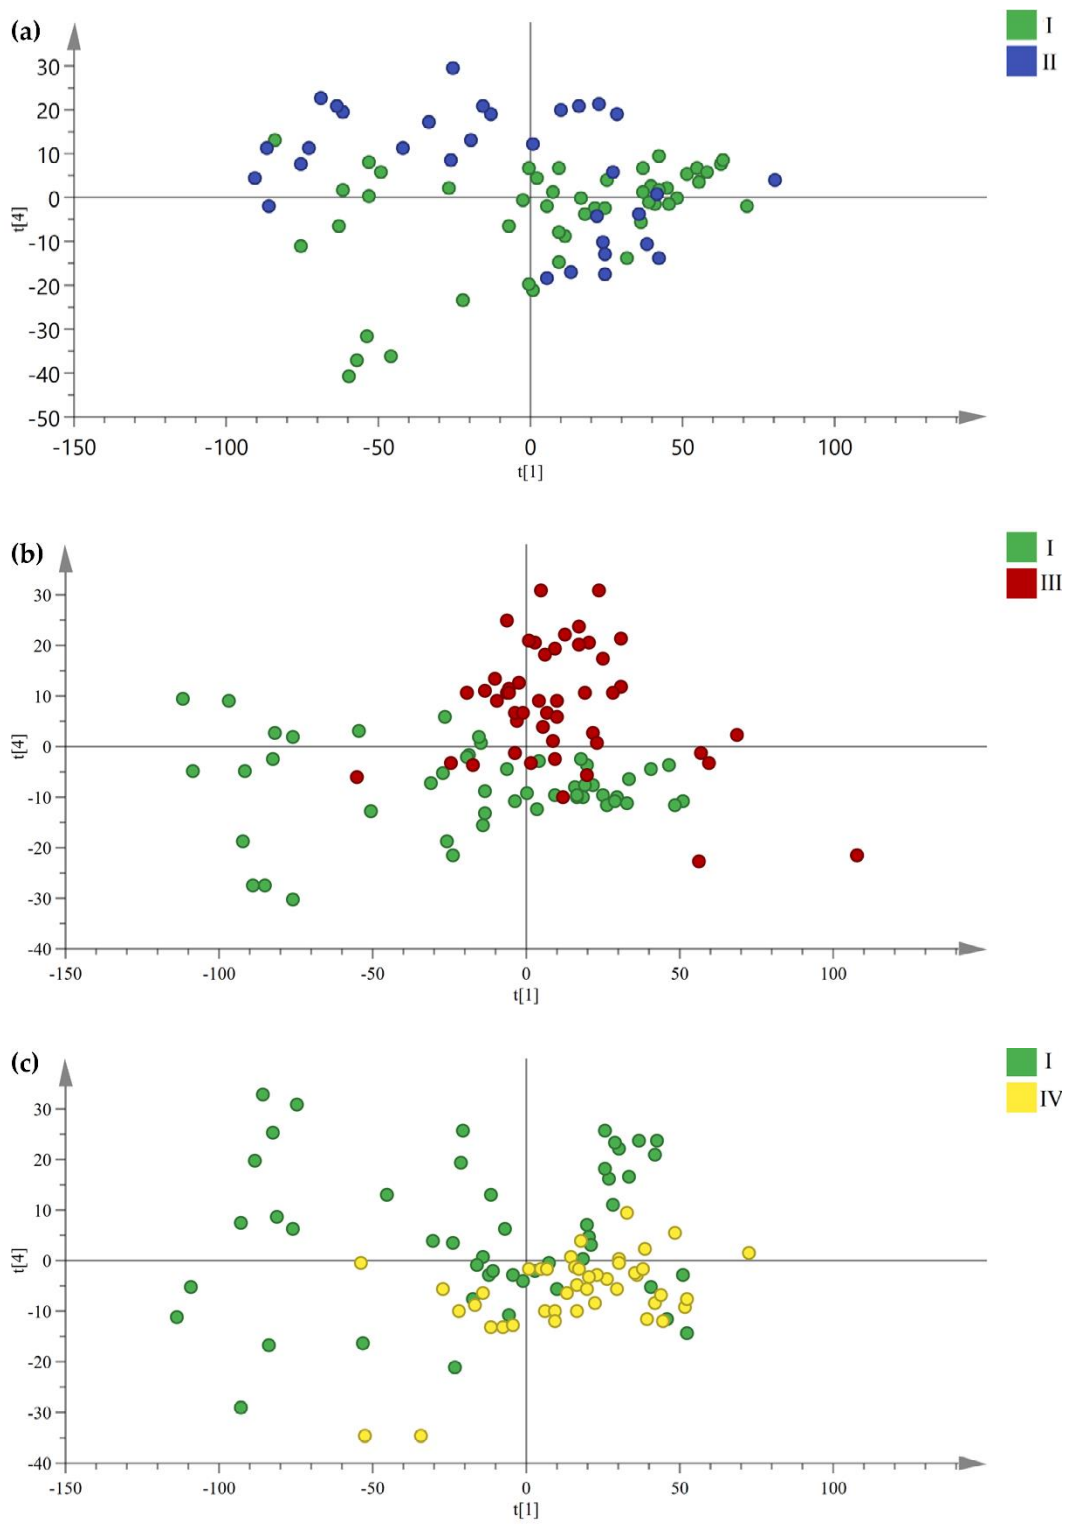

**Figure S3.** Variation of leaves score plots along the latitude gradients (green circles = low latitudes area, 23.92-23.66 °N, blue circles = mid latitude area, 24.95-25.06 °N, red circles = mid-high latitude area, 26.49-26.64 °N, yellow circles = high latitude area, 27.34-28.52 °N)

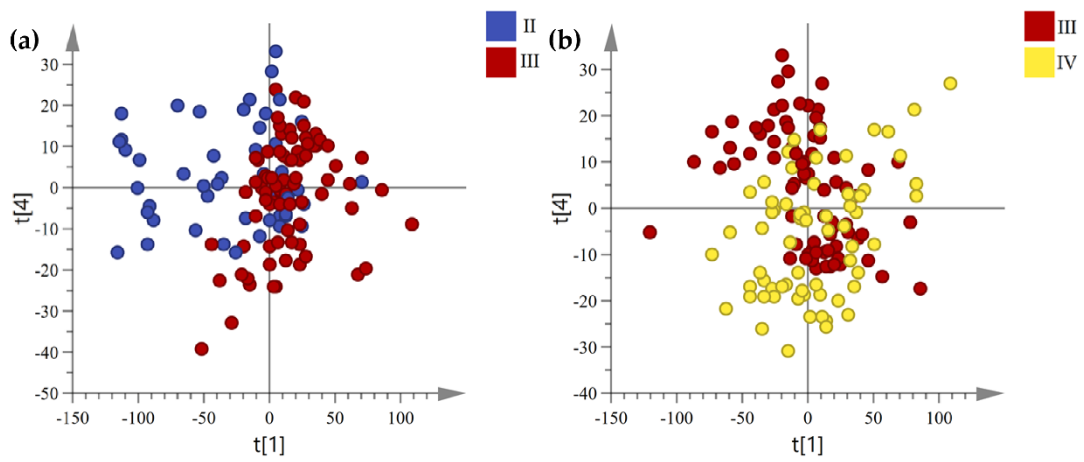

**Figure S4.** Variation of leaves score plots between the adjacent latitudes (blue circles = mid-latitude area, 24.95-25.06 °N, red circles = mid-high latitude area, 26.49-26.64 °N, yellow circles = high latitude area, 27.34-28.52 °N)



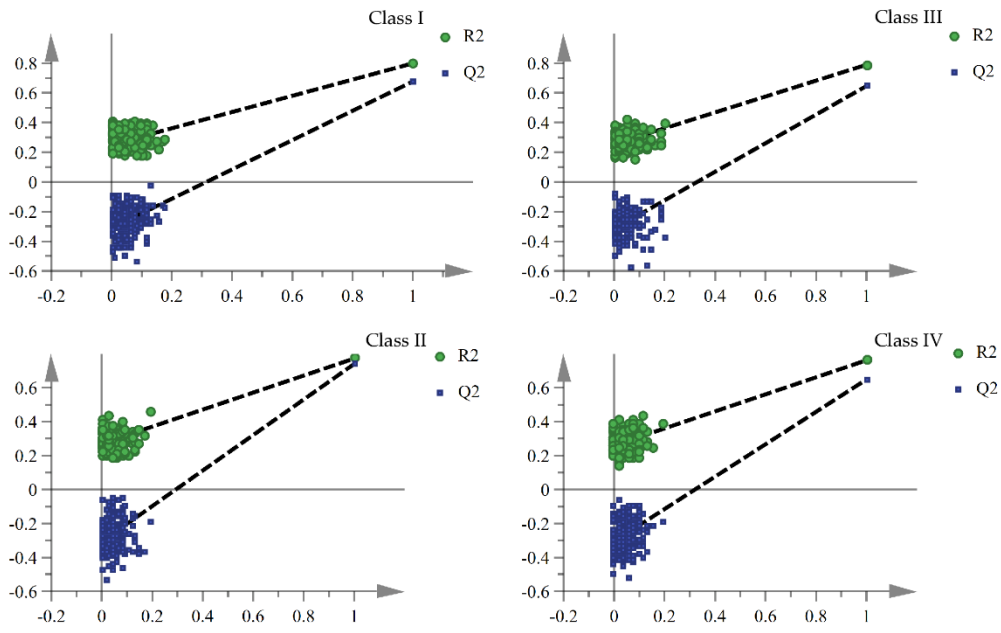

**Figure S5.** Permutation plot of the OPLS-DA of rhizome samples (Number of permutations = 200)

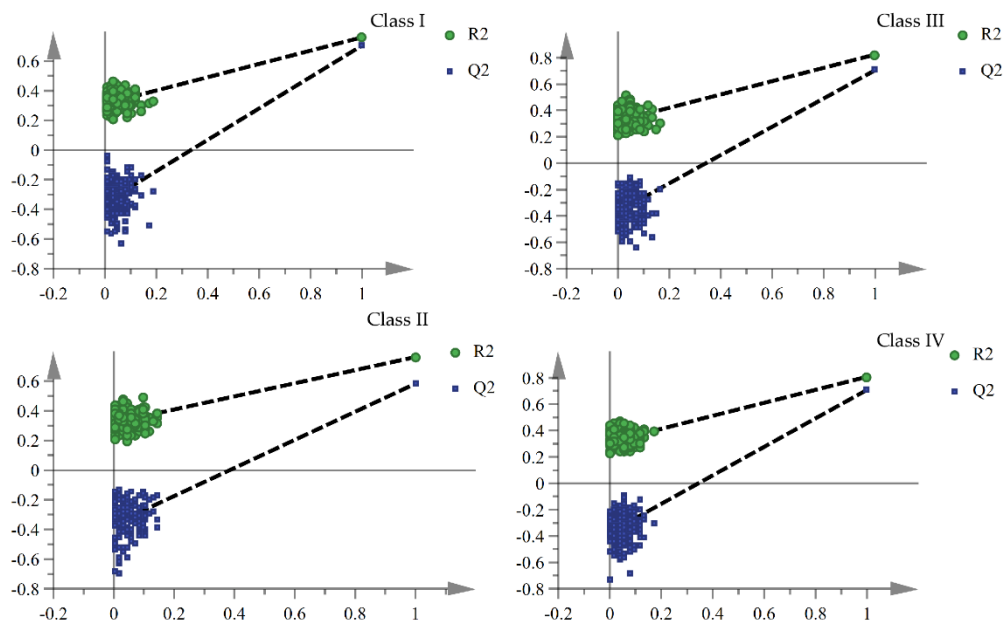

**Figure S6.** Permutation plot of the OPLS-DA of stem samples (Number of permutations = 200)

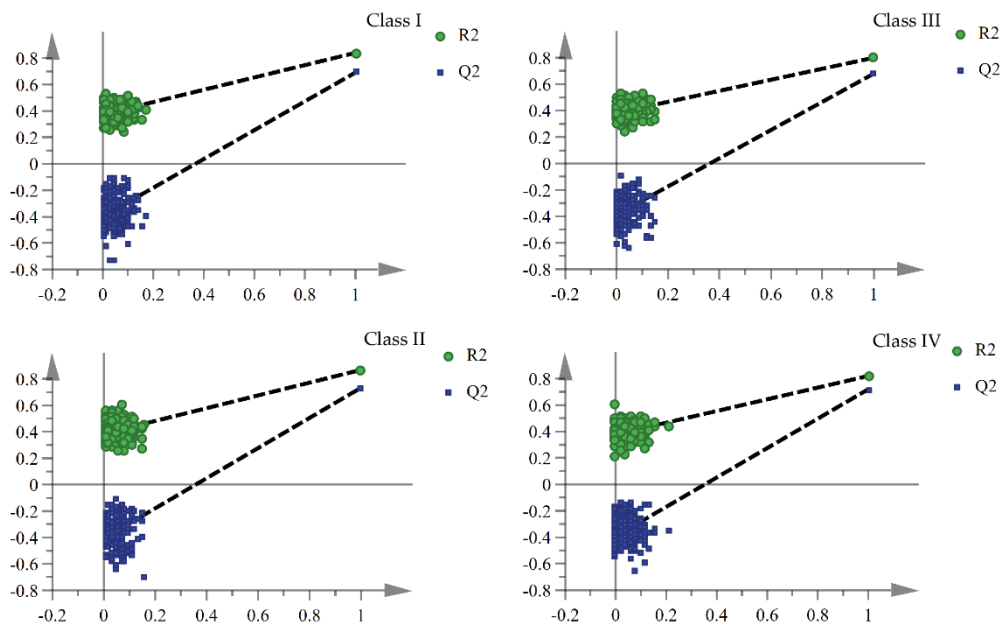

**Figure S7.** Permutation plot of the OPLS-DA of leaf samples (Number of permutations = 200)

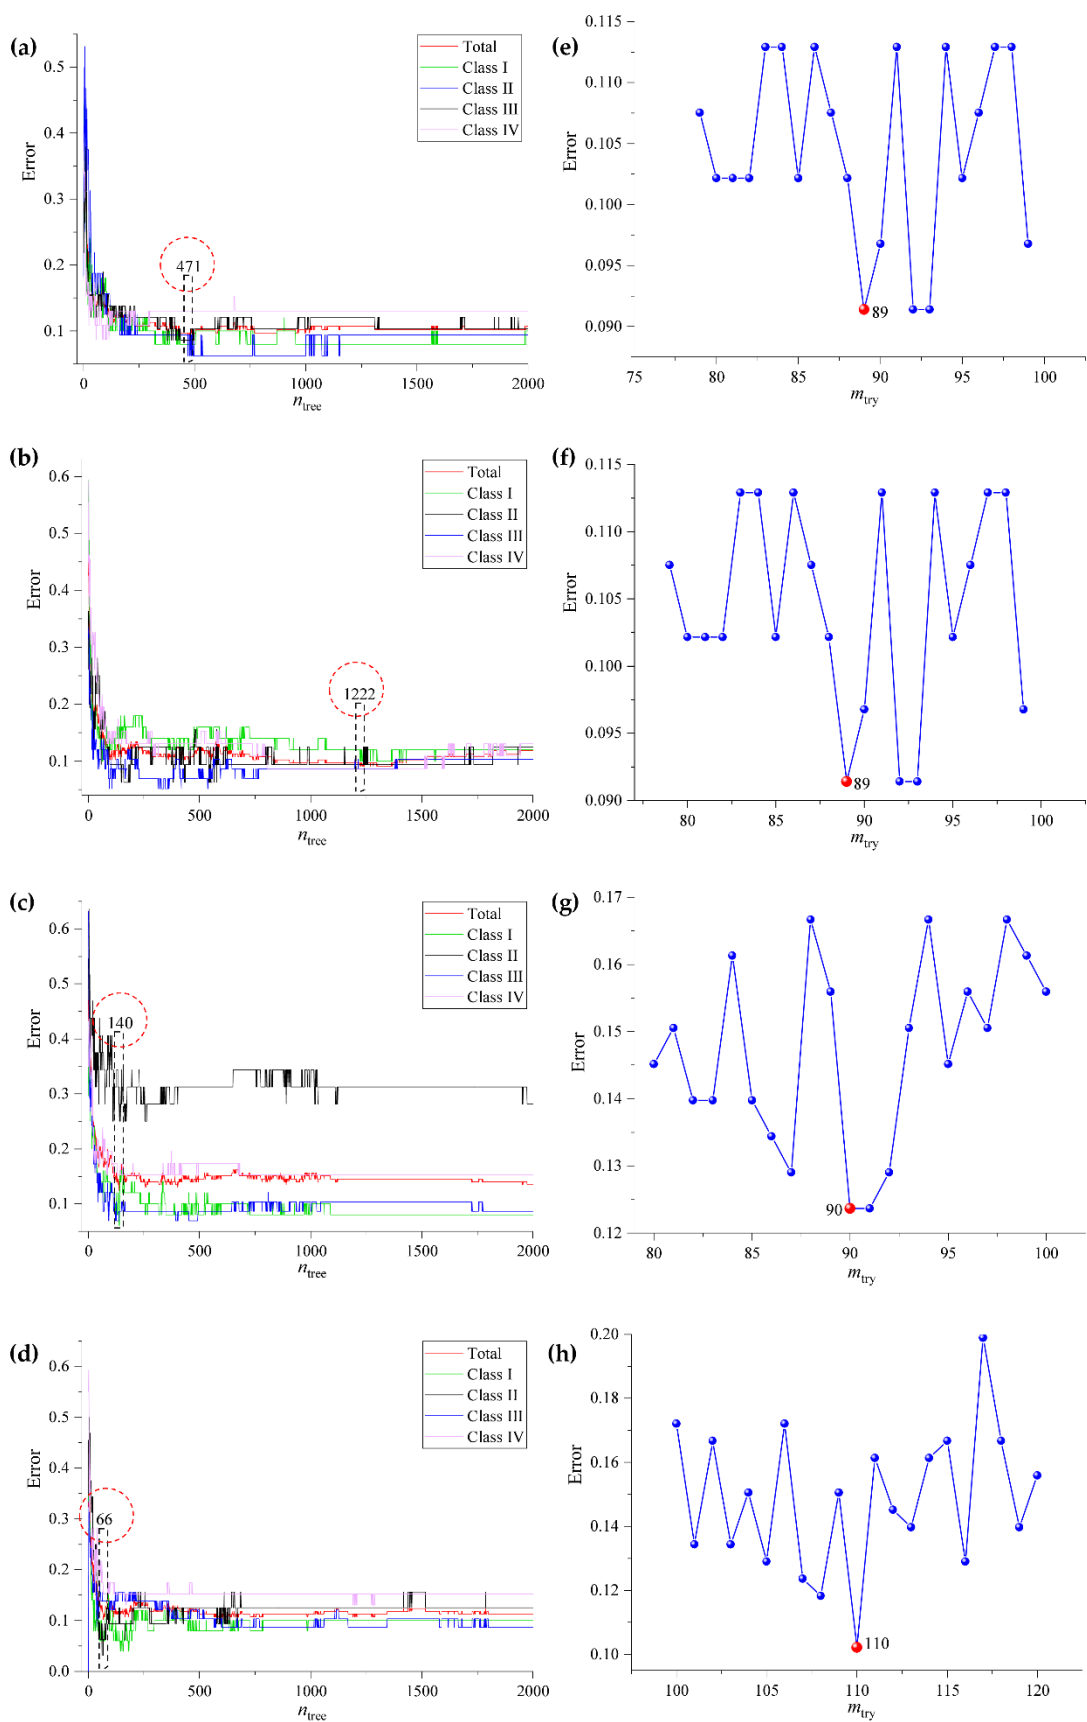

**Figure S8.** The  $n_{tree}$  (a-d) and  $m_{try}$  (e-h) screening of RF models based on low-level data fusion strategy (a and b = fusion data set of rhizomes and stems, c and d = fusion data set of rhizome and leaves, e and f = fusion data set of stems and leaves, g and h = fusion data set of rhizome, stem and leaves)

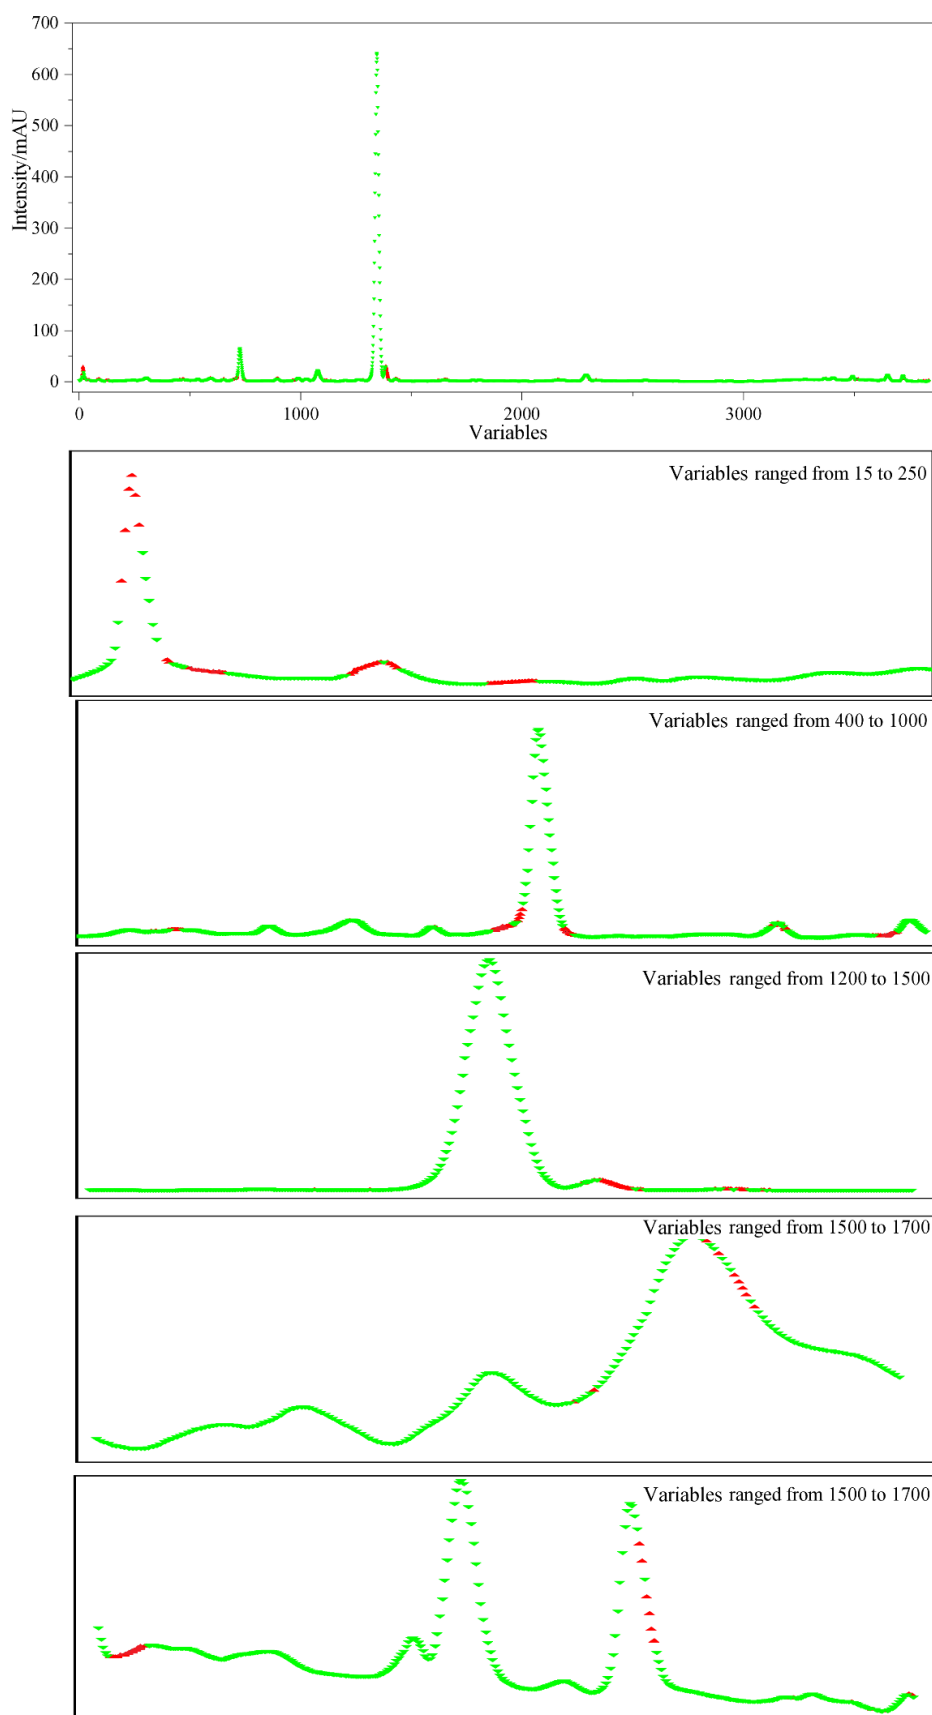

**Figure S9.** Result of variables selection of rhizome fingerprint data based on “Boruta” algorithm (red triangle = relevant features variables)

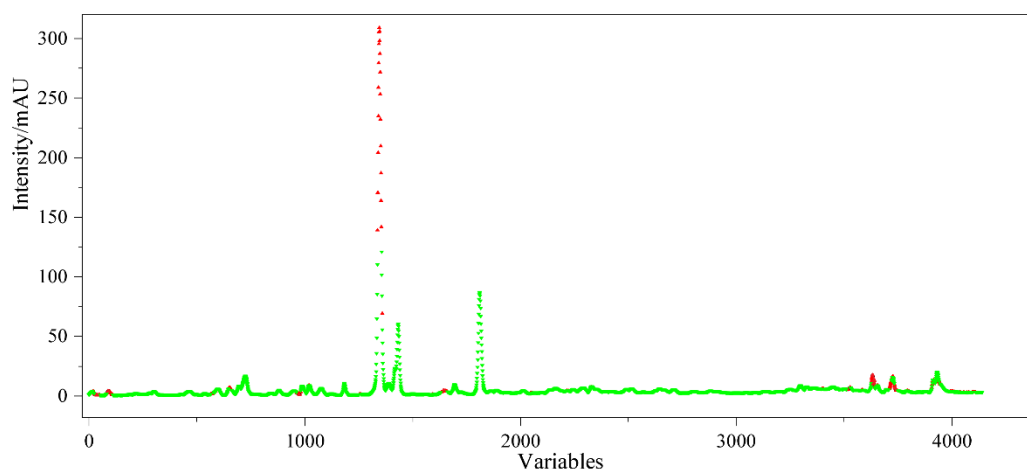

**Figure S10.** Result of variables selection of stem fingerprint data based on “Boruta” algorithm (red triangle = relevant features variables)

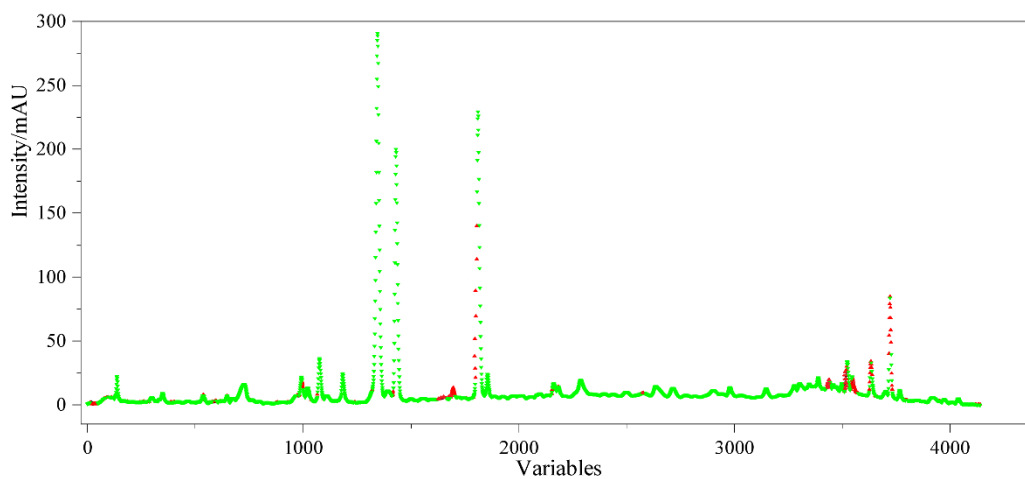

**Figure S11.** Result of variables selection of leaf fingerprint data based on “Boruta” algorithm (red triangle = relevant features variables)

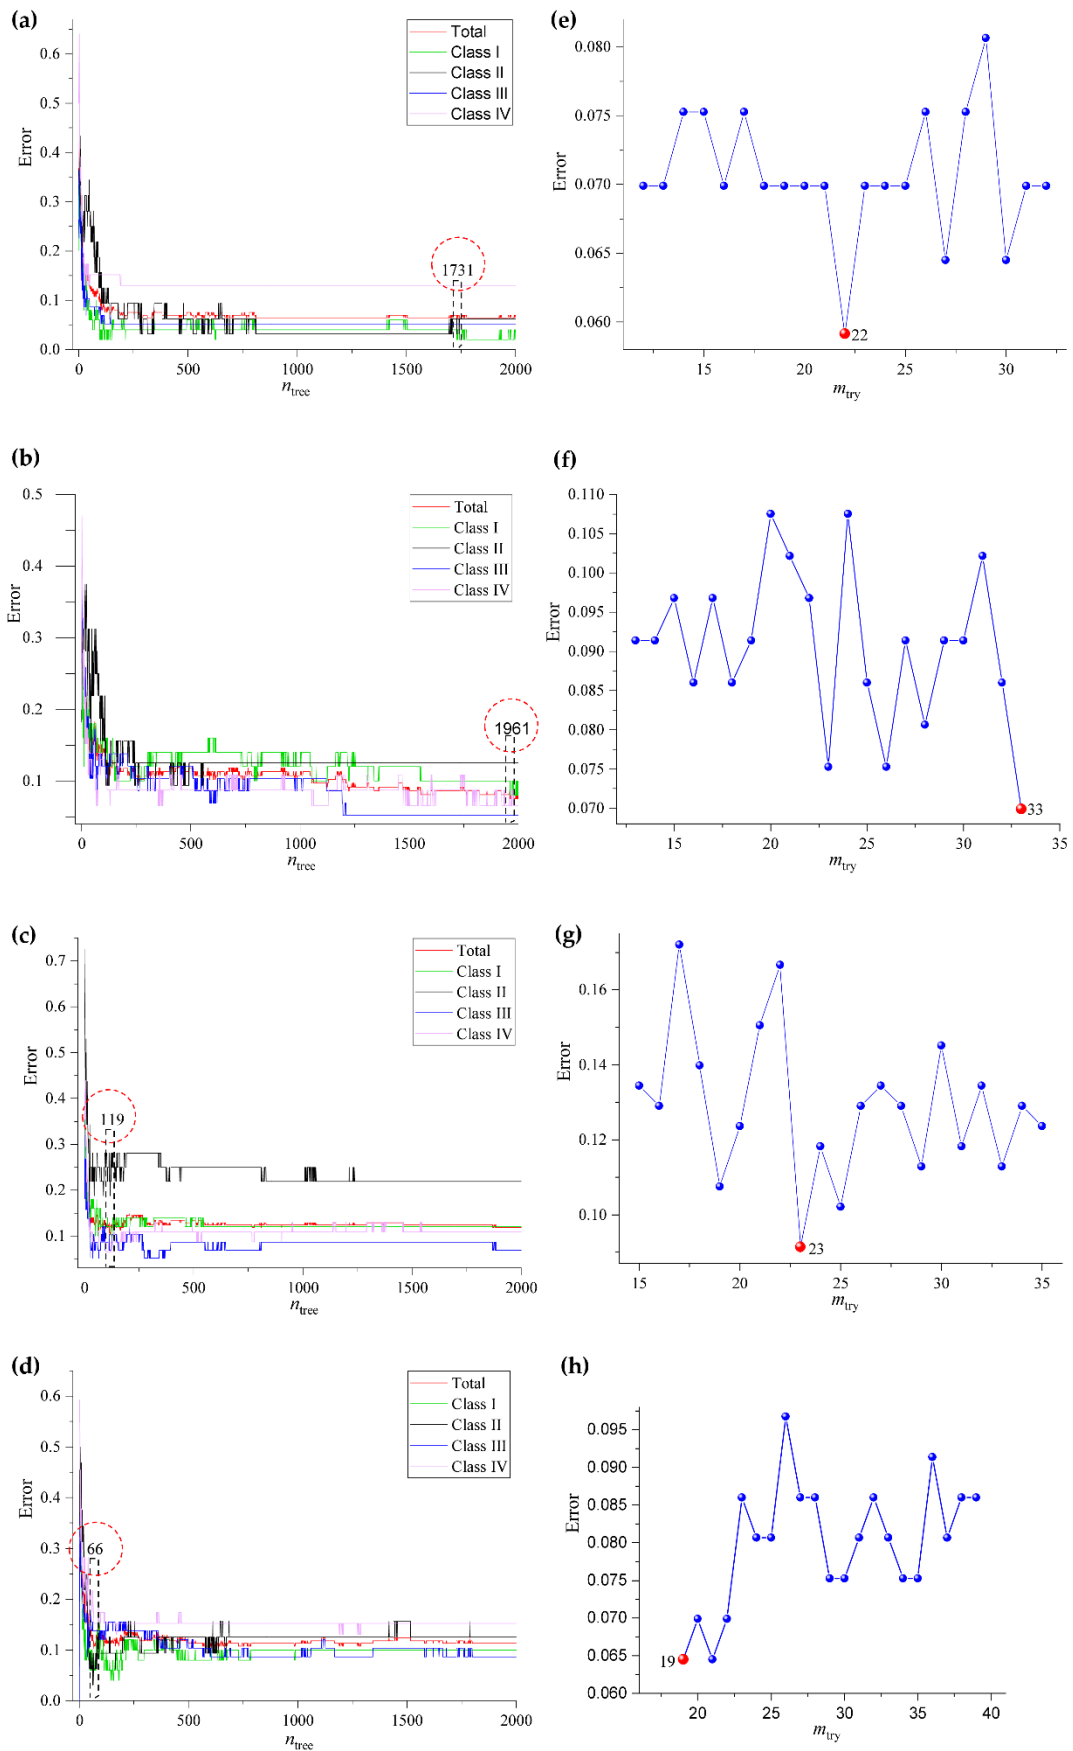

**Figure S12.** The  $n_{tree}$  (a-d) and  $m_{try}$  (e-h) screening of RF models based on mid-level data fusion strategy (a and b = fusion data set of rhizomes and stems, c and d = fusion data set of rhizome and leaves, e and f = fusion data set of stems and leaves, g and h = fusion data set of rhizome, stem and leaves)



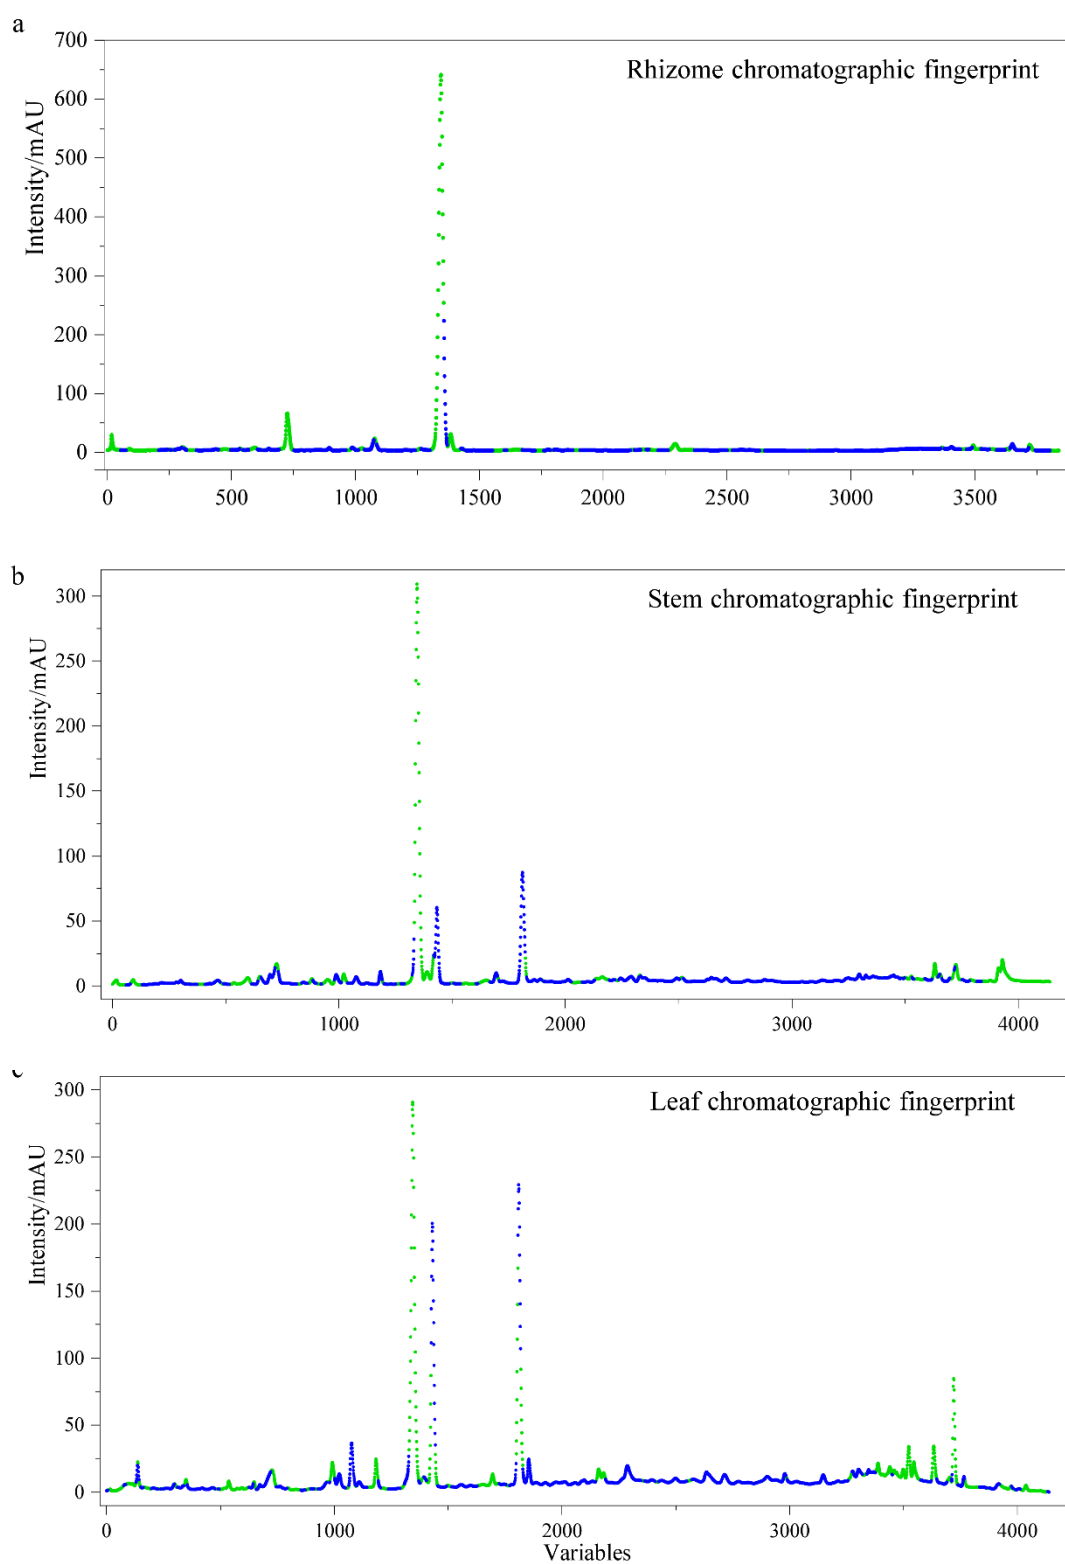

**Figure S13.** The importance variables (green circles = VIP value > 1) of OPLS-DA models of rhizomes, stems and leaves fingerprints data

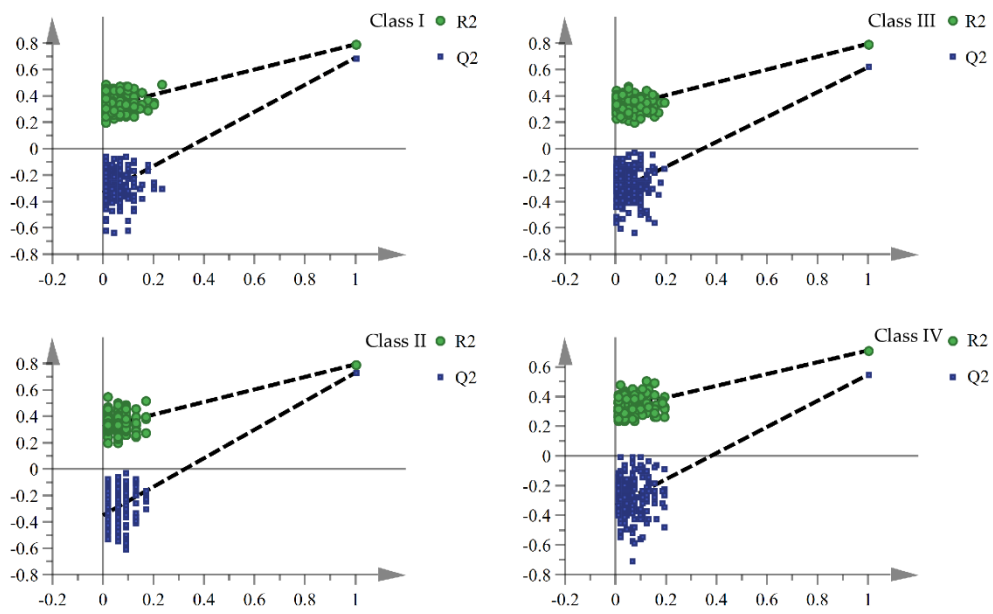

Figure S14. Permutation testing (200 times) of the R\_OPLS-DA model

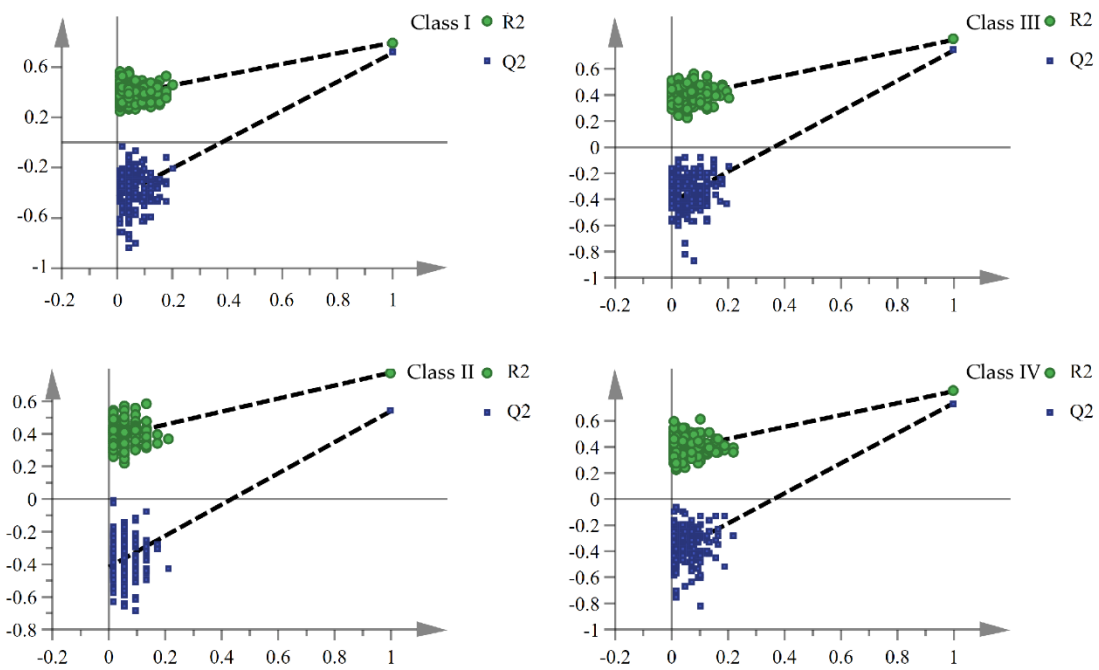

Figure S15. Permutation testing (200 times) of the S\_OPLS-DA model

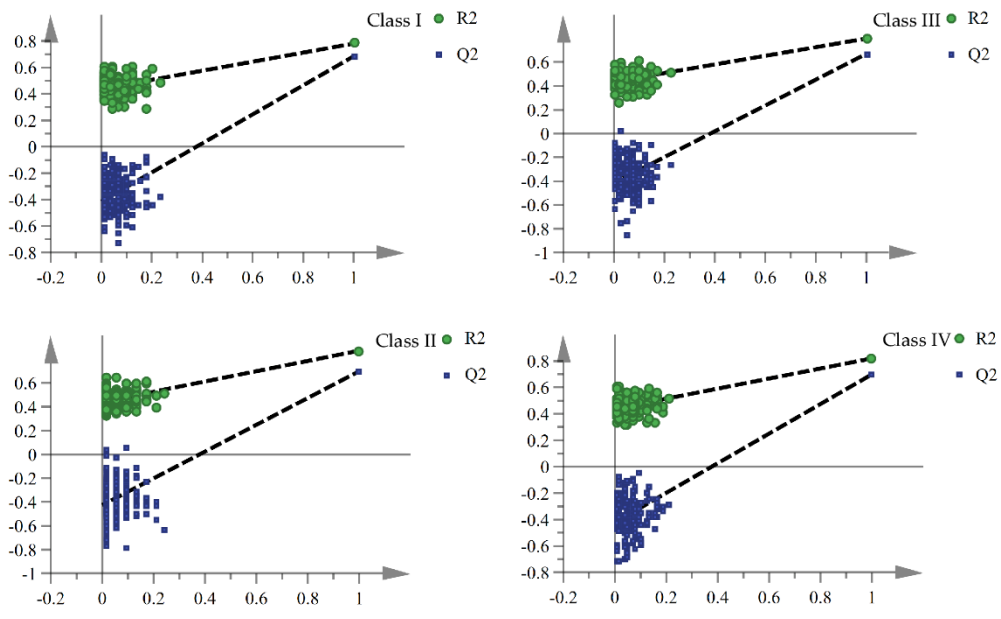

Figure S16. Permutation testing (200 times) of the L\_OPLS-DA model

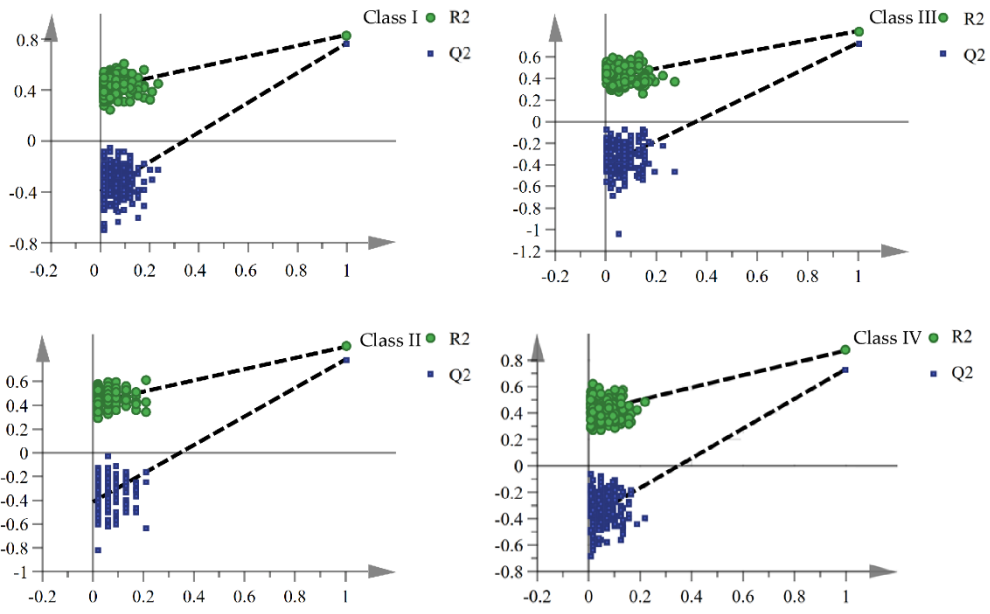

**Figure S17.** Permutation testing (200 times) of the RS\_OPLS-DA model based on low-level data fusion

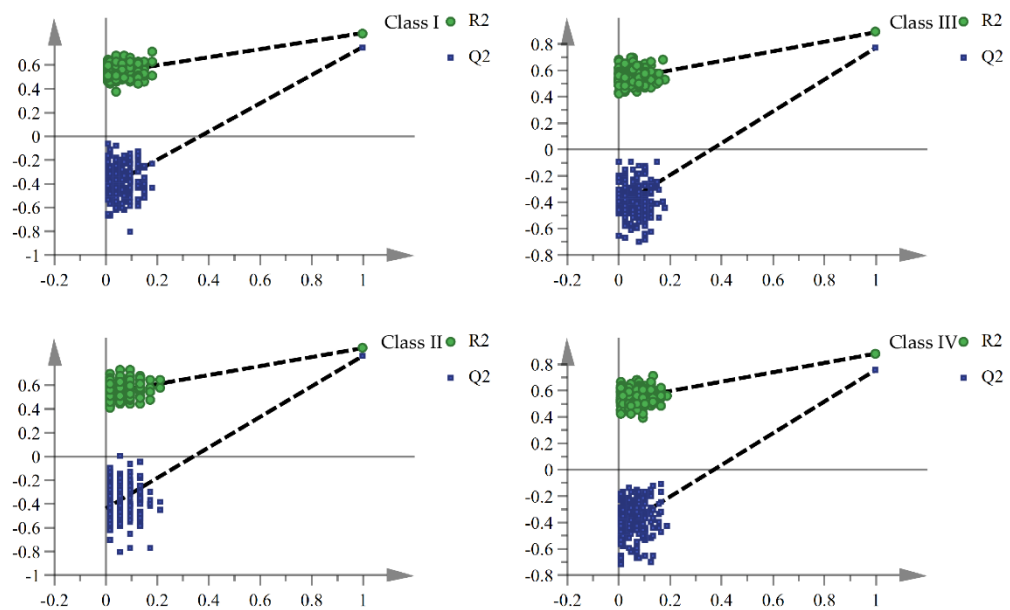

**Figure S18.** Permutation testing (200 times) of the RL\_OPLS-DA model based on low-level data fusion

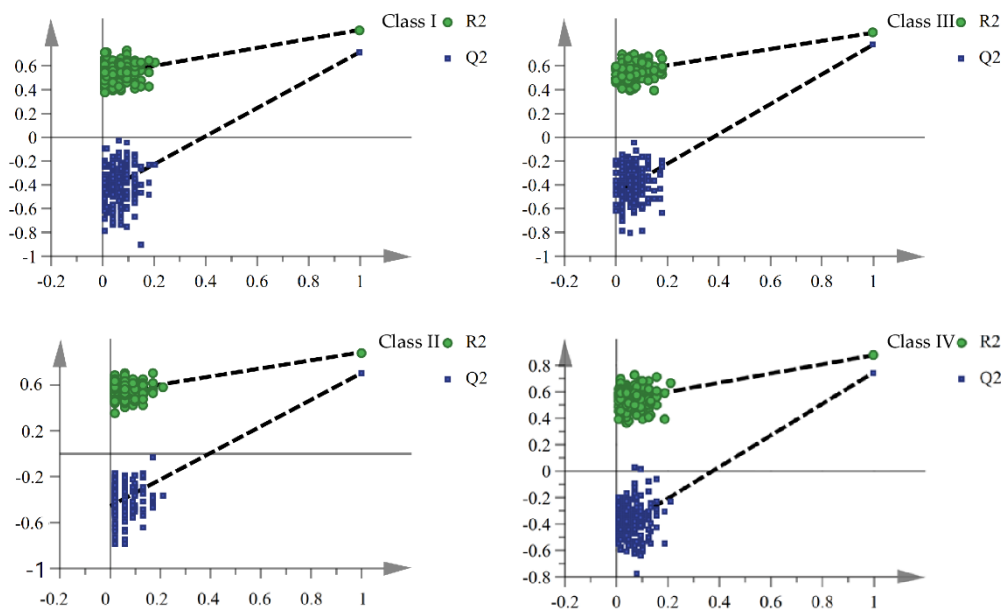

**Figure S19.** Permutation testing (200 times) of the SL\_OPLS-DA model based on low-level data fusion

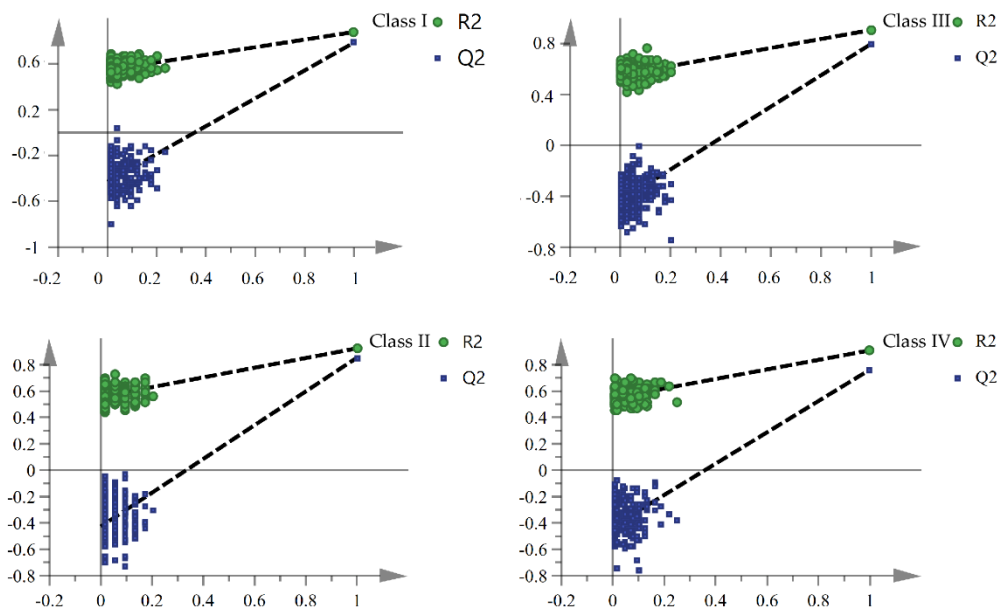

**Figure S20.** Permutation testing (200 times) of the RSL\_OPLS-DA model based on low-level data fusion



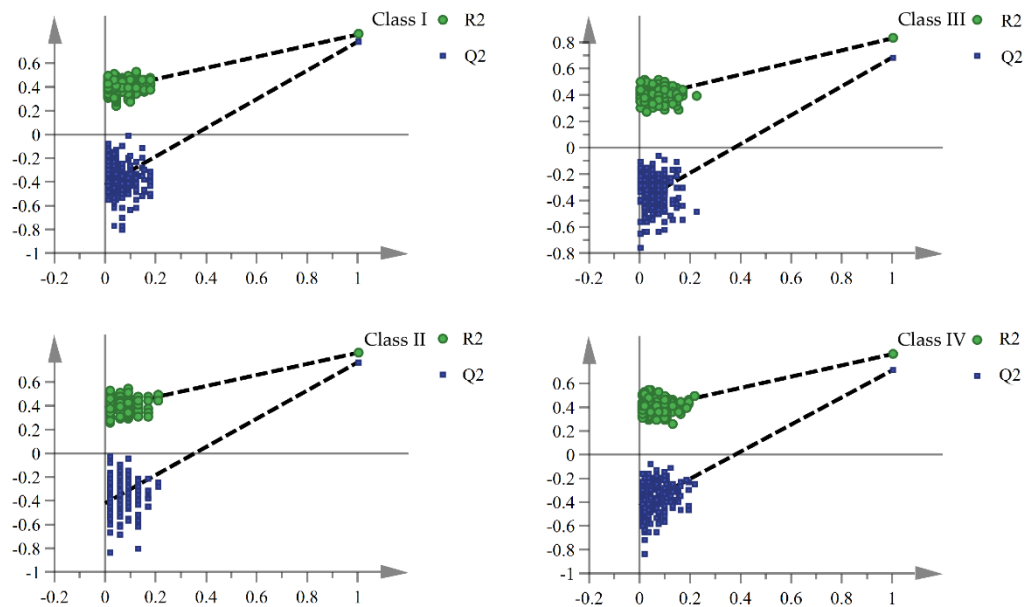

**Figure S21.** Permutation testing (200 times) of the RS\_OPLS-DA model based on mid-level data fusion

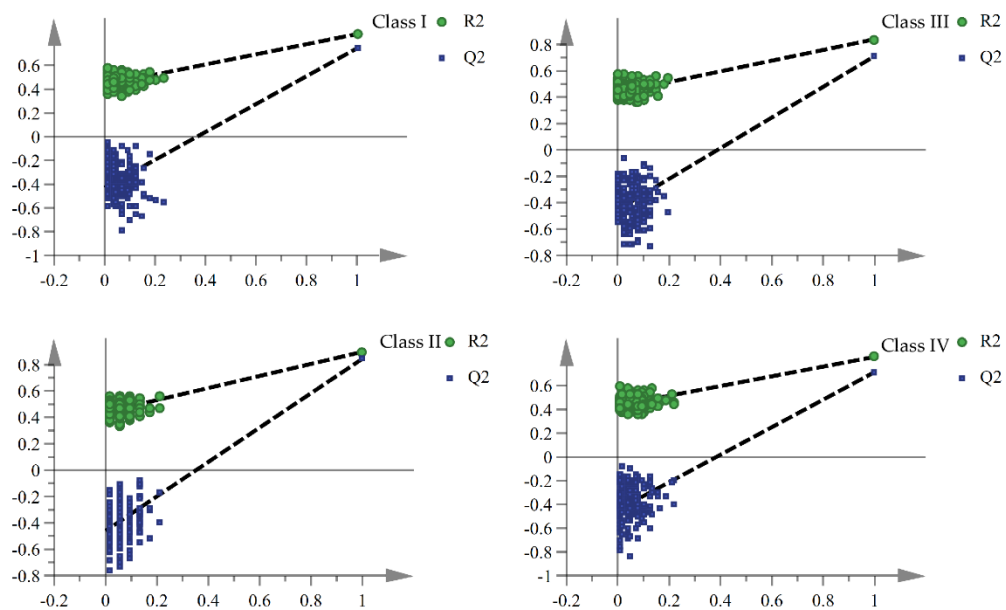

**Figure S22.** Permutation testing (200 times) of the RL\_OPLS-DA model based on mid-level data fusion

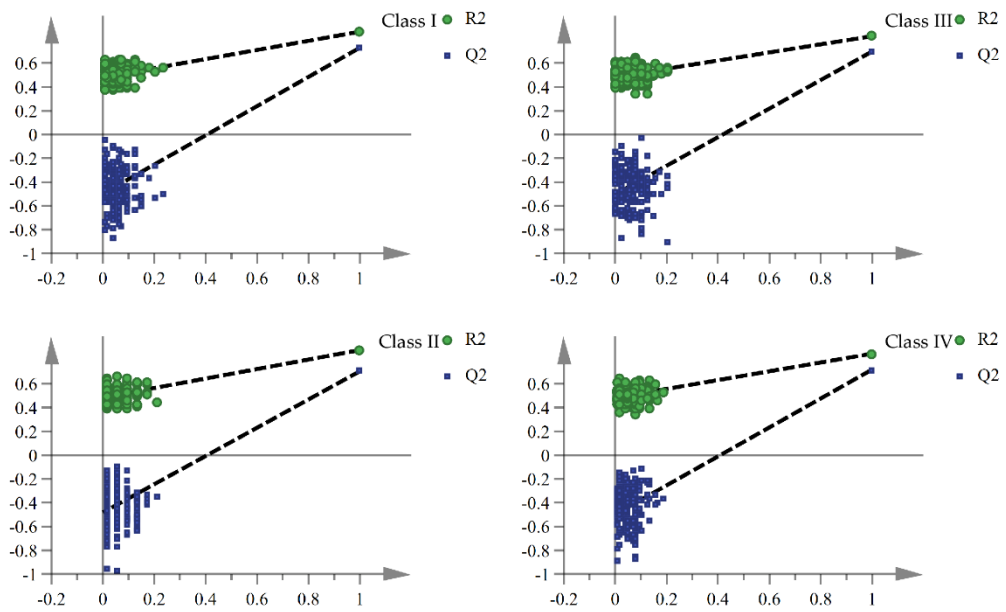

**Figure S23.** Permutation testing (200 times) of the SL\_OPLS-DA model based on mid-level data fusion

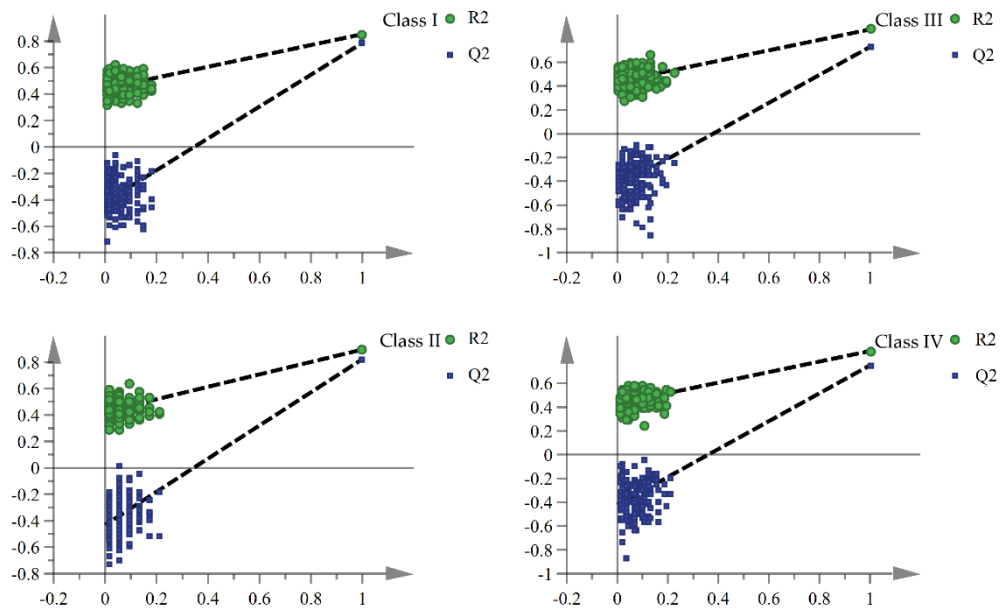

**Figure S24.** Permutation testing (200 times) of the RSL\_OPLS-DA model based on mid-level data fusion

**Table S1.** The evaluation indexes for predictive power of OPLS-DA model of rhizome, stem and leaf

| Model     | $R^2$ | $Q^2$ | $RMSEE$ | $RMSECV$ | $RMSEP$ |
|-----------|-------|-------|---------|----------|---------|
| R_OPLS-DA | 0.77  | 0.65  | 0.21    | 0.26     | 0.26    |
| S_OPLS-DA | 0.81  | 0.68  | 0.19    | 0.24     | 0.27    |
| L_OPLS-DA | 0.82  | 0.69  | 0.19    | 0.24     | 0.26    |

**Table S2.** The evaluation indexes for predictive power of OPLS-DA models based on low-level and mid-level data fusion strategies

| Model       | Data fusion strategy | $R^2$ | $Q^2$ | $RMSEE$ | $RMSECV$ | $RMSEP$ |
|-------------|----------------------|-------|-------|---------|----------|---------|
| RS_OPLS-DA  | low-level            | 0.86  | 0.75  | 0.17    | 0.21     | 0.24    |
| RL_OPLS-DA  | low-level            | 0.89  | 0.78  | 0.16    | 0.20     | 0.22    |
| SL_OPLS-DA  | low-level            | 0.89  | 0.74  | 0.15    | 0.22     | 0.23    |
| RSL_OPLS-DA | low-level            | 0.90  | 0.80  | 0.14    | 0.19     | 0.22    |
| RS_OPLS-DA  | mid-level            | 0.84  | 0.74  | 0.18    | 0.22     | 0.24    |
| RL_OPLS-DA  | mid-level            | 0.86  | 0.75  | 0.17    | 0.21     | 0.24    |
| SL_OPLS-DA  | mid-level            | 0.86  | 0.71  | 0.17    | 0.23     | 0.24    |
| RSL_OPLS-DA | mid-level            | 0.87  | 0.77  | 0.16    | 0.20     | 0.23    |
